# Supplementary material for: Nanoporous metal based flexible asymmetric pseudocapacitors
Source: Royal Society of Chemistry journal article supplement (doi:10.1039/c4ta00969j), 2014-01-01
Supplement: c4ta00969j1.pdf [file c4ta00969j1.pdf]

## Supplementary Information

### Nanoporous Metal Based Flexible Asymmetric Pseudocapacitors

Ying Hou<sup>ab+</sup>, Luyang Chen<sup>b+</sup>, Pan Liu<sup>b</sup>, Jianli Kang<sup>b</sup>, Takeshi Fujita<sup>b</sup> and Mingwei Chen<sup>bcd\*</sup>

<sup>a</sup> *Key Laboratory of Interface Science and Engineering in Advanced Materials, Taiyuan*

*University of Technology, Ministry of Education, Taiyuan 030024, PR China*

<sup>b</sup> *World Premier International (WPI) Research Center, Advanced Institute for Materials*

*Research, Tohoku University, Sendai 980-8577, Japan*

<sup>c</sup> *CREST, Japan Science and Technology Agency (JST), Saitama 332-0012, Japan*

<sup>d</sup> *State Key Laboratory of Metal Matrix Composites, School of Materials Science and*

*Engineering, Shanghai Jiao Tong University, Shanghai 200030, PR China*

<sup>+</sup>These authors contributed equally to this work.

\* Corresponding author. E-mail address: mwchen@wpi-aimr.tohoku.ac.jp

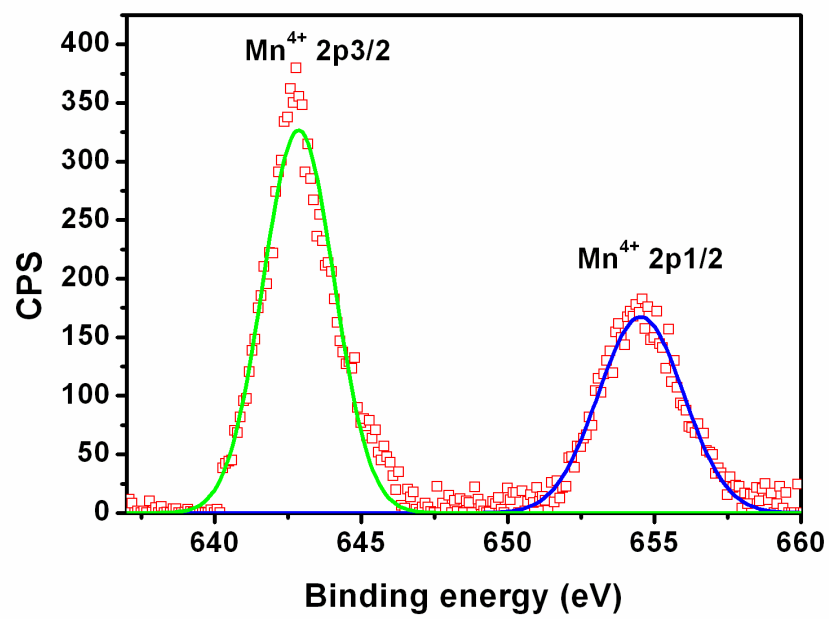

**Fig. S1** XPS spectrum of Mn 2p orbit for the  $\text{MnO}_2$  deposited on NPG.

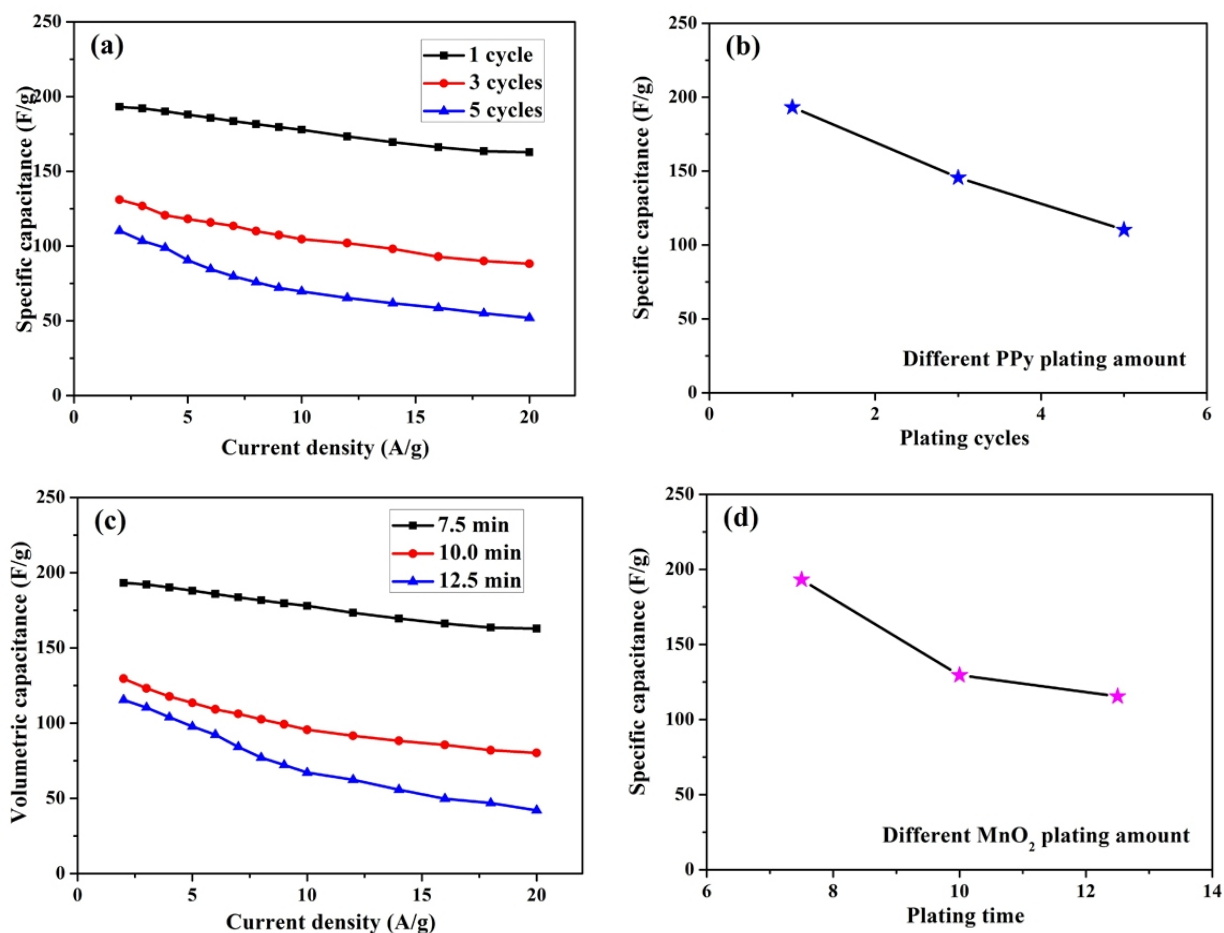

**Fig. S2.** (a) Specific capacitance of PPy-NPG//MnO<sub>2</sub>-NPG asymmetric supercapacitor with 7.5 min-plated MnO<sub>2</sub> and different plating cycles PPy. (b) Relationship between specific capacitance and PPy plating cycles. (c) Specific capacitance of PPy-NPG//MnO<sub>2</sub>-NPG asymmetric supercapacitor with 1 cycle-plated PPy and different plating times MnO<sub>2</sub>. (d) Relationship between specific capacitance and MnO<sub>2</sub> plating times.

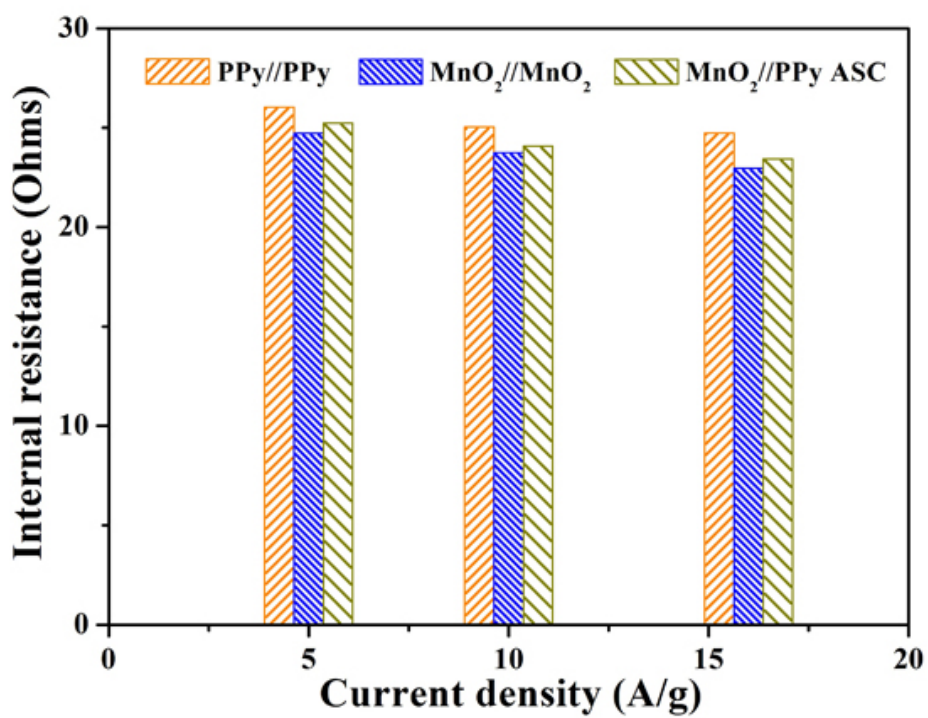

**Fig. S3.** Internal resistances of the PPy-NPG//MnO<sub>2</sub>-NPG asymmetric supercapacitor, PPy-NPG//PPy-NPG symmetric supercapacitor and MnO<sub>2</sub>-NPG//MnO<sub>2</sub>-NPG symmetric supercapacitor at different current densities.
